# Supplementary material
Source: ML conference proceedings conference paper supplement (https://openreview.net/forum?id=Cdc90HKs1I)
Supplement: supplementary_material [file attachment]

## 1    **A    Supplementary Material**

### 2    **A.1    Dataset Access**

3    The Genomics LRB is hosted publicly as a dataset repository on HuggingFace at [https://hf.](https://hf.co/datasets/InstaDeepAI/genomics-long-range-benchmark)  
4    [co/datasets/InstaDeepAI/genomics-long-range-benchmark](https://hf.co/datasets/InstaDeepAI/genomics-long-range-benchmark) where both the data and files  
5    to process the data can be found. The meta data associated with our benchmark is located in the  
6    **README** on our HuggingFace repository. The croissant meta data tool was not able to be used due  
7    to the custom nature of our dataset files.

### 8    **A.2    Long Term Preservation**

9    The Genomics LRB is hosted on HuggingFace where users may view and download data by accessing  
10   the repository through their browser or can use Hugging Face’s API to access and download the  
11   dataset programmatically, with a single line of code. In addition to ease-of-use, Hugging Face  
12   repositories provide a reliable, stable way to store data and is a framework that is consistently  
13   maintained.

14   Users may raise issues and submit pull requests via the Genomic LRB’s Hugging Face webpage  
15   which will be addressed by the authors.

### 16   **A.3    Intended Use**

17   The Genomics LRB is intended to be used by the research community as a tool to assess the  
18   capabilities of genomic language models to ultimately lead to their improvement.

### 19   **A.4    License**

20   The Genomics LRB is licensed under the Creative Commons Attribution Non Commercial Share  
21   Alike 4.0 license.

### 22   **A.5    Author Statement**

23   Authors of this paper bear all responsibility in case of violation of rights.
